# Supplementary material for: Zwitterionic organocatalysis for ring-opening polymerization of cyclic esters
Source: Royal Society of Chemistry journal article supplement (doi:10.1039/d4gc01171f), 2024-01-01
Supplement: d4gc01171f1.pdf [file d4gc01171f1.pdf]

## Supporting Information

### Zwitterionic organocatalysis for ring-opening polymerization of cyclic esters

Yue Xu<sup>a</sup>, Peng Guo<sup>b</sup>, Zhenjiang Li<sup>a, \*</sup>, Ziqi Liu<sup>a</sup>, Tianyu Zhu<sup>a</sup>, Yujia Wang<sup>a</sup>, Hao Zhang<sup>a</sup>,  
Wei He<sup>a</sup>, Mingfu Lyu<sup>b</sup>, Kai Guo<sup>a, \*</sup>

<sup>a</sup> *State Key Laboratory Materials-Oriented Chemical Engineering, College of Biotechnology and Pharmaceutical Engineering, Nanjing Tech University, 30 Puzhu Road South, Nanjing 211816, China.*

<sup>b</sup> *Beijing Research Institute of Chemical Industry, SINOPEC, Beijing 100013, P. R. China.*

Fax + 86 25 5813 9935; E-mail: [zjli@njtech.edu.cn](mailto:zjli@njtech.edu.cn); [guok@njtech.edu.cn](mailto:guok@njtech.edu.cn)

## Contents

|                                                      |    |
|------------------------------------------------------|----|
| <sup>1</sup> H NMR spectrum of PLLA                  | S3 |
| <sup>1</sup> H NMR spectrum of PTMC                  | S3 |
| <sup>1</sup> H NMR spectrum of PVL                   | S4 |
| <sup>1</sup> H NMR spectrum of PCL                   | S4 |
| <sup>1</sup> H NMR spectrum of PTMC- <i>b</i> -PLLA  | S5 |
| SEC traces of PTMC and PTMC- <i>b</i> -PLLA          | S5 |
| <sup>1</sup> H NMR spectrum of L-carnitine           | S6 |
| <sup>13</sup> C NMR spectrum of L-carnitine          | S6 |
| <sup>1</sup> H NMR spectrum of acetyl-carnitine      | S7 |
| <sup>13</sup> C NMR spectrum of acetyl-carnitine     | S7 |
| <sup>1</sup> H NMR spectrum of gamma-butyrobetaine   | S8 |
| <sup>13</sup> C NMR spectrum of gamma-butyrobetaine  | S8 |
| <sup>1</sup> H NMR spectrum of beta-alanine betaine  | S9 |
| <sup>13</sup> C NMR spectrum of beta-alanine betaine | S9 |

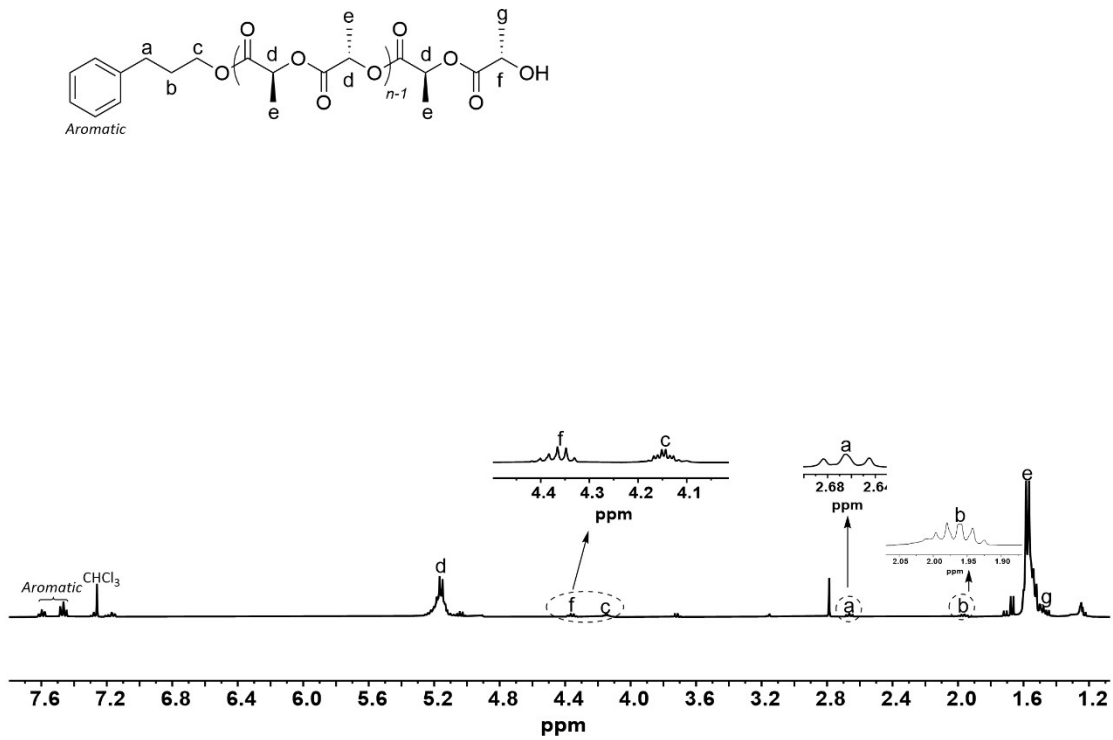

**Figure S1.** <sup>1</sup>H NMR spectrum of PLLA.

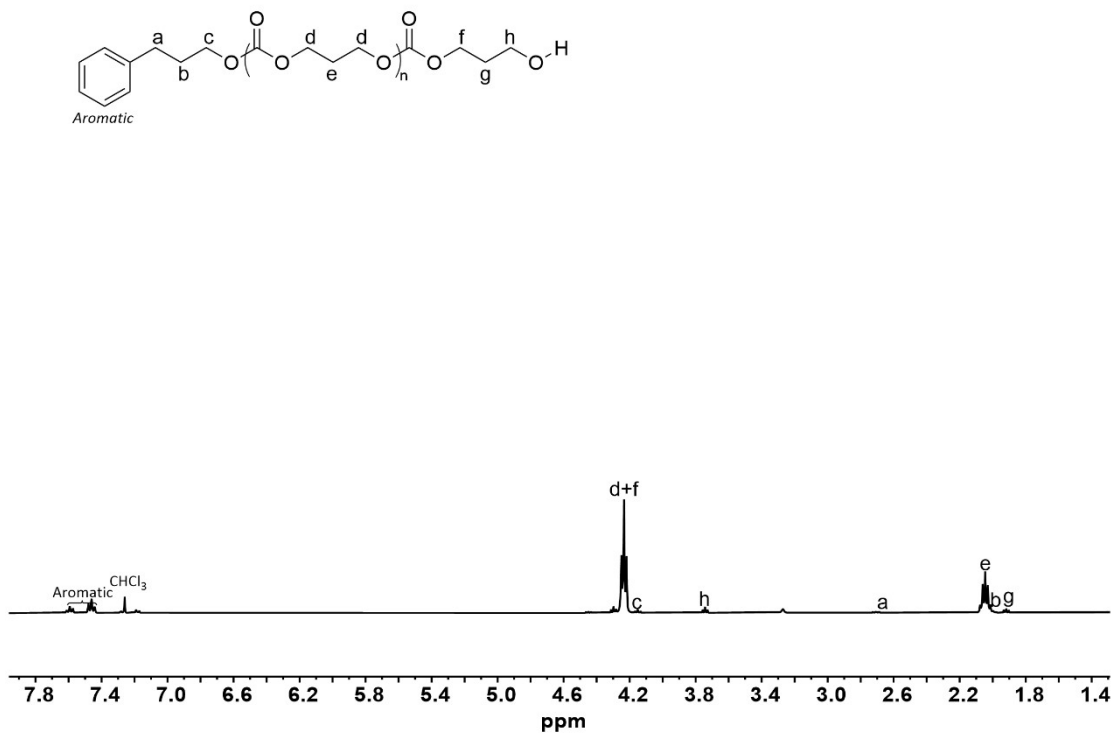

**Figure S2.** <sup>1</sup>H NMR spectrum of PTMC.

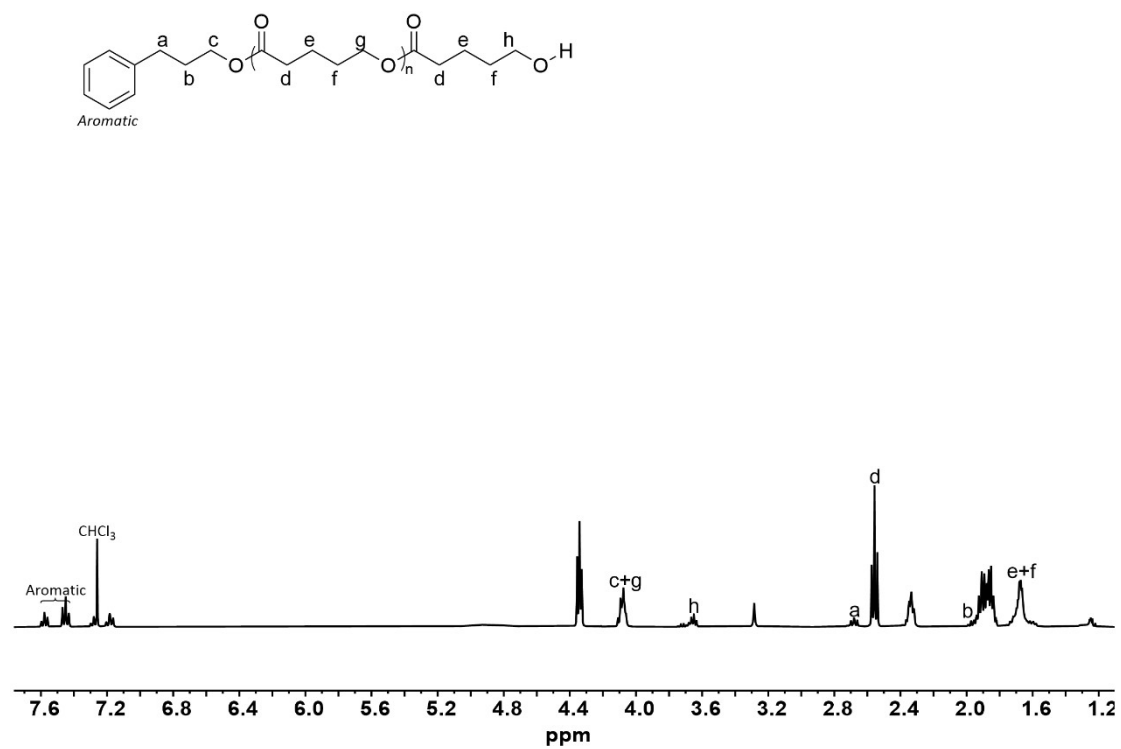

**Figure S3.** <sup>1</sup>H NMR spectrum of PVL.

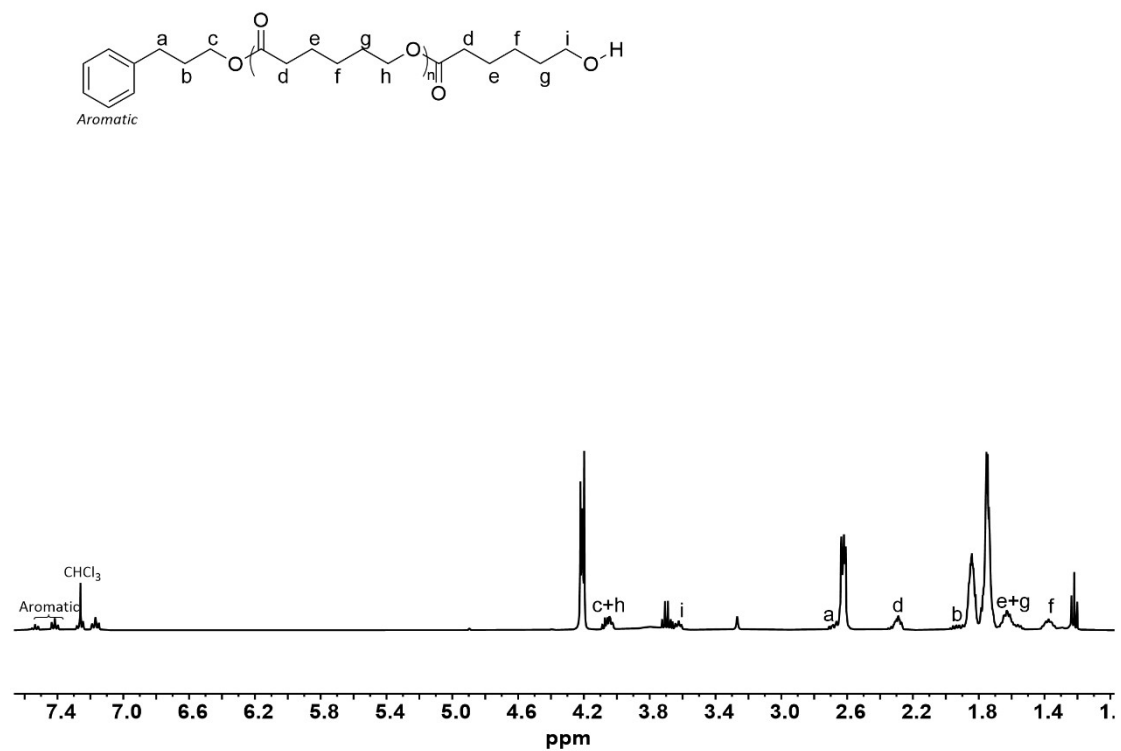

**Figure S4.** <sup>1</sup>H NMR spectrum of PCL.

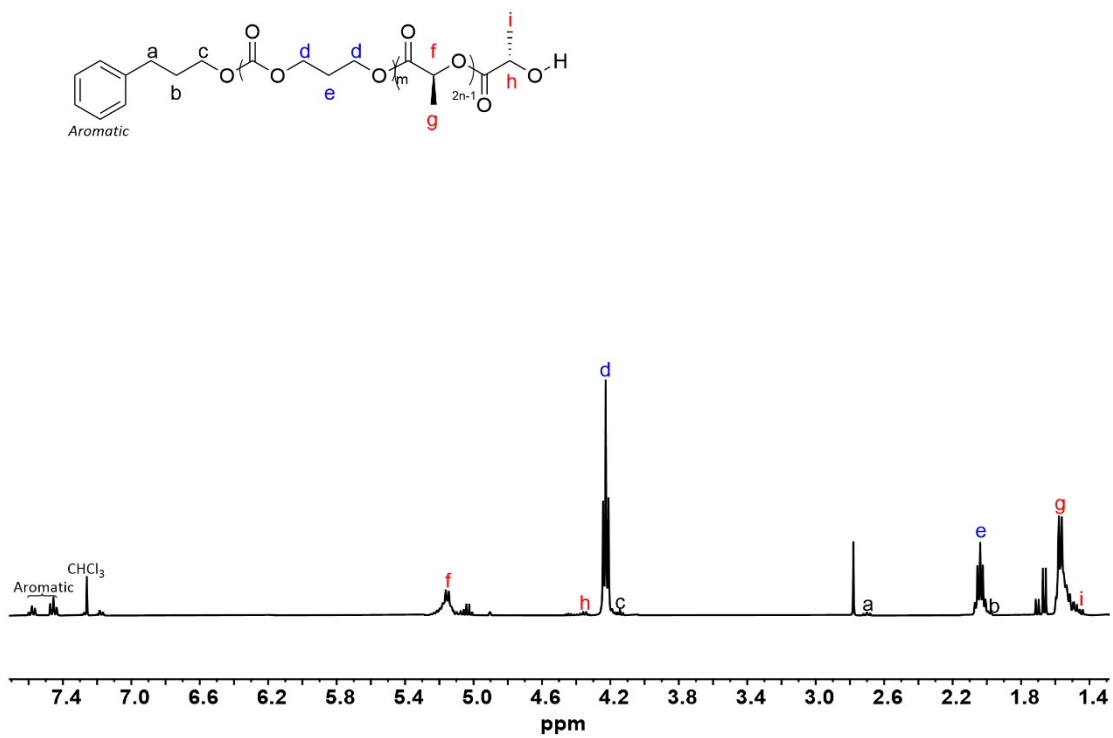

**Figure S5.** <sup>1</sup>H NMR spectrum of PTMC-*b*-PLLA.

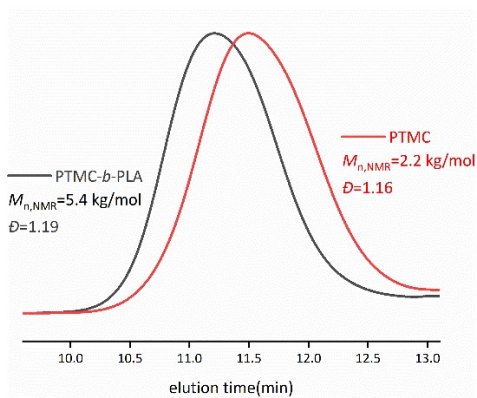

**Figure S6.** SEC traces of PTMC and PTMC-*b*-PLLA.

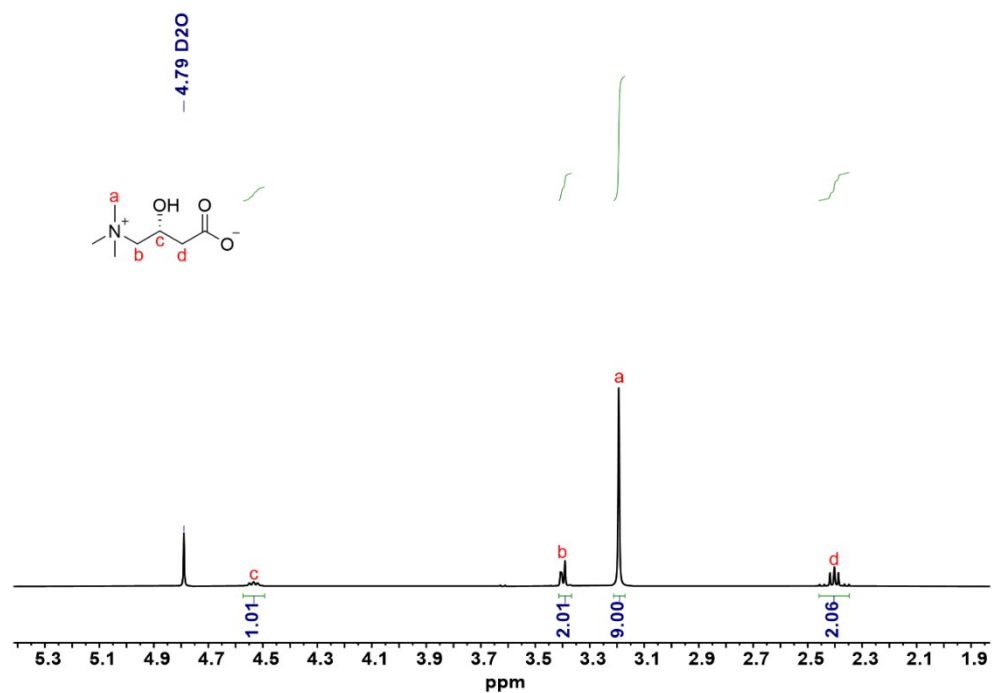

**Figure S7.**  $^1\text{H}$  NMR spectrum of L-carnitine.  $^1\text{H}$  NMR (400 MHz, Deuterium Oxide)  $\delta$

4.57 – 4.49 (m, 1H), 3.41 – 3.37 (m, 2H), 3.19 (s, 9H), 2.46 – 2.35 (m, 2H).

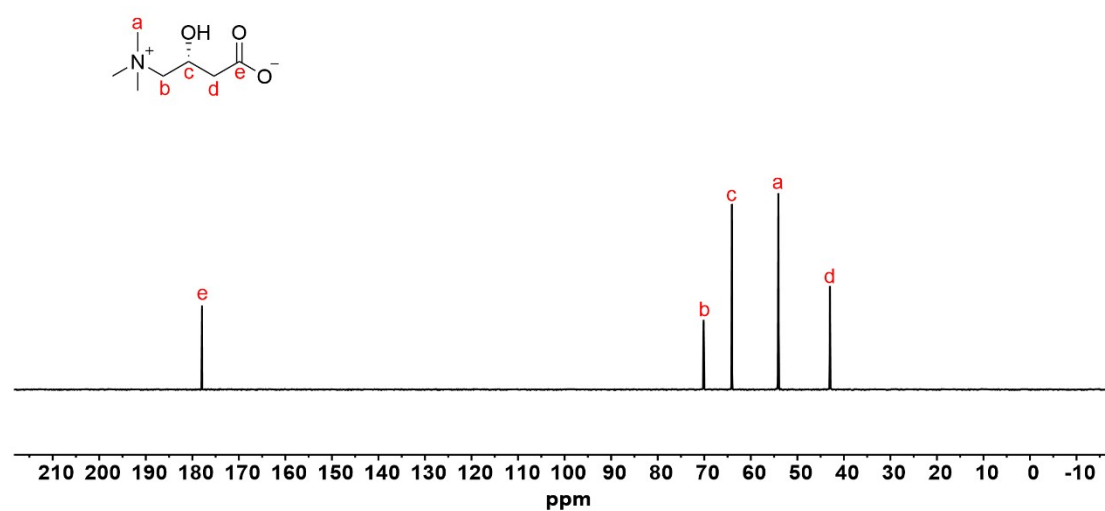

**Figure S8.**  $^{13}\text{C}$  NMR spectrum of L-carnitine.

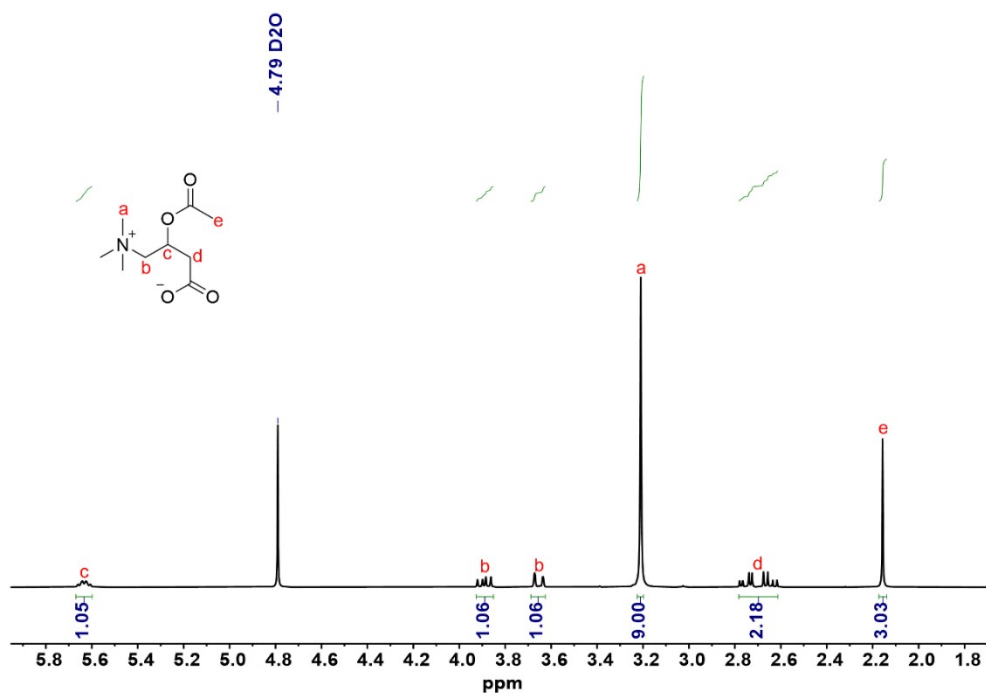

**Figure S9.**  $^1\text{H}$  NMR spectrum of acetyl-carnitine.  $^1\text{H}$  NMR (400 MHz, Deuterium Oxide)

$\delta$  5.67 – 5.60 (m, 1H), 3.89 (dd,  $J = 14.5, 8.8$  Hz, 1H), 3.65 (dd,  $J = 14.5, 1.4$  Hz, 1H), 3.21

(s, 9H), 2.78 – 2.61 (m, 2H), 2.16 (s, 3H).

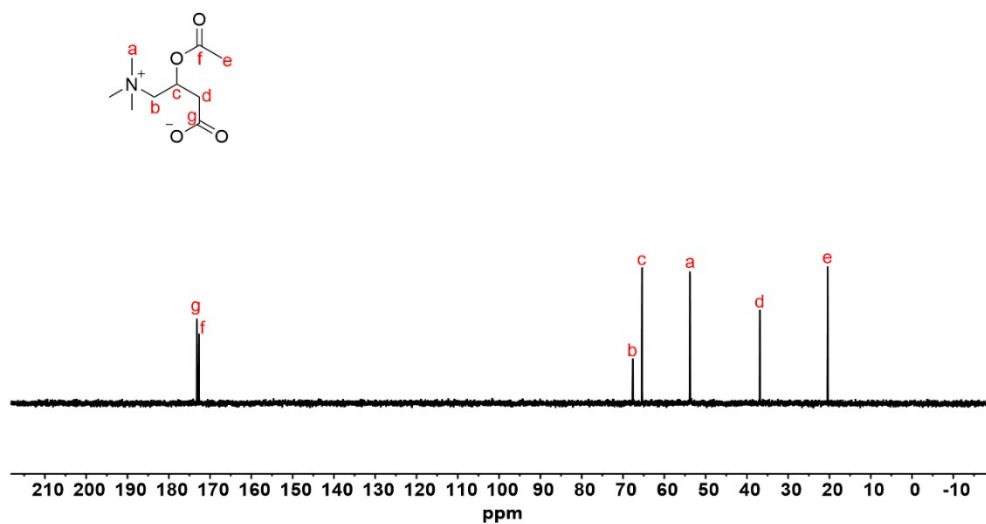

**Figure S10.**  $^{13}\text{C}$  NMR spectrum of acetyl-carnitine.

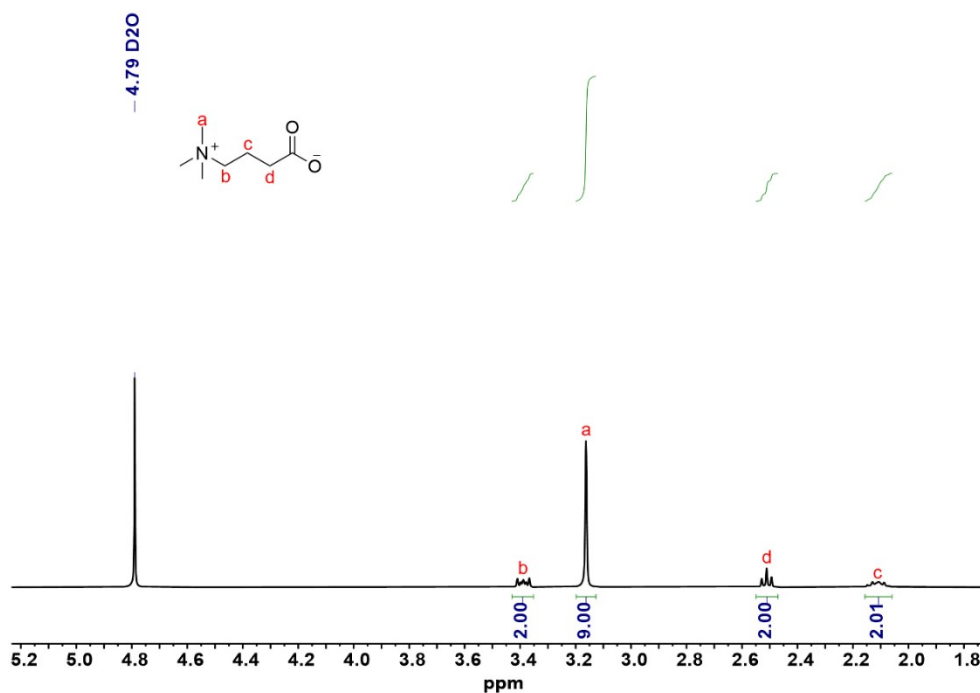

**Figure S11.** <sup>1</sup>H NMR spectrum of gamma-butyrobetaine. <sup>1</sup>H NMR (400 MHz, Deuterium Oxide) δ 3.43 – 3.35 (m, 2H), 3.16 (s, 9H), 2.51 (t, *J* = 7.0 Hz, 2H), 2.16 – 2.06 (m, 2H).

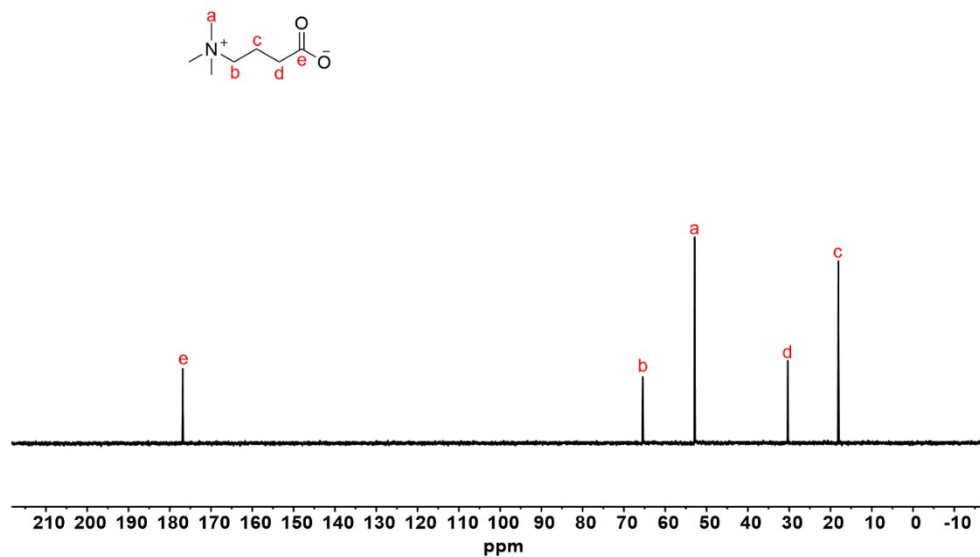

**Figure S12.** <sup>13</sup>C NMR spectrum of gamma-butyrobetaine.



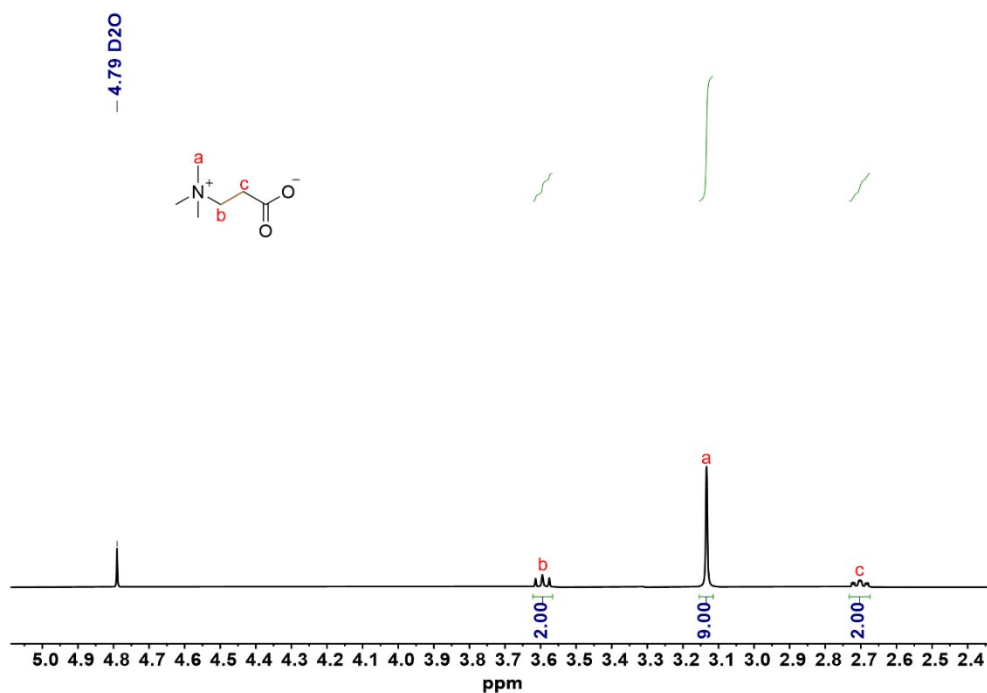

**Figure S13.**  $^1\text{H}$  NMR spectrum of beta-alanine betaine.  $^1\text{H}$  NMR (400 MHz, Deuterium Oxide)  $\delta$  3.59 (dd,  $J = 8.2, 7.1$  Hz, 2H), 3.13 (d,  $J = 0.9$  Hz, 9H), 2.73 – 2.67 (m, 2H).

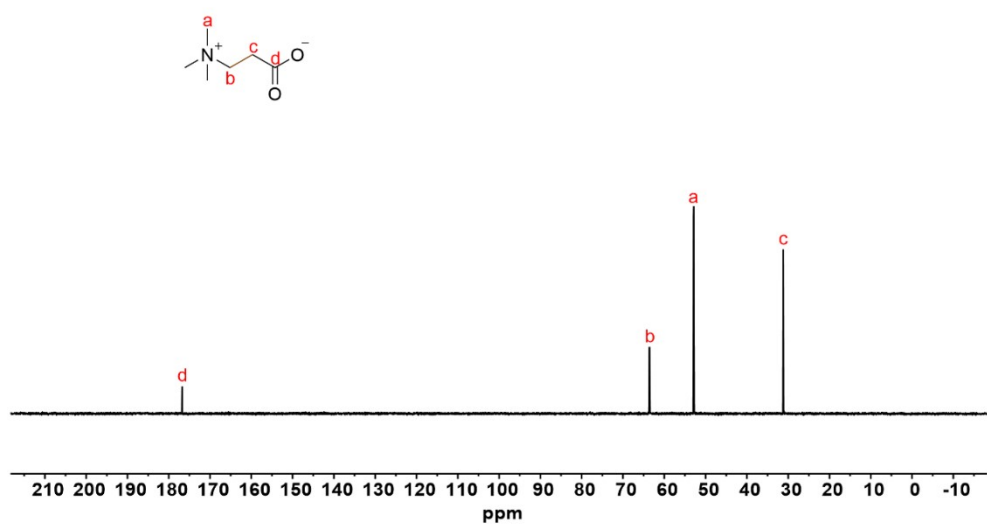

**Figure S14.**  $^{13}\text{C}$  NMR spectrum of beta-alanine betaine.
